# Supplementary material
Source: PubMed Central journal article supplement (PMC4918766)
Supplement: NIHMS779827-supplement-3.pdf [file NIHMS779827-supplement-3.pdf]

## Supplementary Table 1

Gaussians widths ( $\sigma$ ) and temperature bias ( $\Delta T$ ) used in each of the simulation replicas in the Bias-Exchange Well-Tempered Metadynamics calculations<sup>a</sup>.

| Replica | Collective variables<br>biased | $\sigma (V_1)$<br>[nm] | $\sigma (V_2)^b$<br>[nm] | $\sigma (V_3)$<br>[nm] | $\sigma (V_4)$ | $\sigma (V_5)$ | 298 K + $\Delta T$<br>(K) |
|---------|--------------------------------|------------------------|--------------------------|------------------------|----------------|----------------|---------------------------|
| 1       | $V_1, V_2$                     | 0.035                  | 0.035                    | -                      | -              | -              | 4470                      |
| 2       | $V_1, V_2$                     | 0.035                  | 0.035                    | -                      | -              | -              | 4470                      |
| 3       | $V_1, V_2, V_3$                | 0.116                  | 0.116                    | 0.116                  | -              | -              | 2214                      |
| 4       | $V_1, V_2, V_3$                | 0.100                  | 0.100                    | 0.100                  | -              | -              | 1831                      |
| 5       | $V_1, V_2, V_3$                | 0.083                  | 0.083                    | 0.083                  | -              | -              | 1447                      |
| 6       | $V_1, V_2, V_3$                | 0.066                  | 0.066                    | 0.066                  | -              | -              | 1064                      |
| 7       | $V_1, V_2, V_3$                | 0.050                  | 0.050                    | 0.050                  | -              | -              | 681                       |
| 8       | unbiased                       | -                      | -                        | -                      | -              | -              | -                         |
| 9       | $V_1, V_2, V_4, V_5$           | 0.150                  | 0.150                    | -                      | 0.1050         | 0.002250       | 2214                      |
| 10      | $V_1, V_2, V_4, V_5$           | 0.125                  | 0.125                    | -                      | 0.0875         | 0.001875       | 1831                      |
| 11      | $V_1, V_2, V_4, V_5$           | 0.100                  | 0.100                    | -                      | 0.0700         | 0.001500       | 1447                      |
| 12      | $V_1, V_2, V_4, V_5$           | 0.075                  | 0.075                    | -                      | 0.0525         | 0.001125       | 1064                      |
| 13      | $V_1, V_2, V_4, V_5$           | 0.050                  | 0.050                    | -                      | 0.0350         | 0.000750       | 681                       |
| 14      | $V_4, V_5$                     | -                      | -                        | -                      | 0.0350         | 0.000750       | 4470                      |
| 15      | $V_4, V_5$                     | -                      | -                        | -                      | 0.0350         | 0.000750       | 4470                      |
| 16      | $V_4, V_5$                     | -                      | -                        | -                      | 0.0350         | 0.000750       | 4470                      |

<sup>(a)</sup> Gaussian functions were added to the biasing potential acting on each variable at 5-ps intervals, and were initially 2 kJ/mol in height. The height of these Gaussians functions was progressively scaled down as prescribed by the Well-Tempered Metadynamics method (Branduardi, D. et al. *J. Chem. Theor. Comp.* **8**, 2247-2254, 2012). To avoid systematic errors, the inversion condition was applied to the upper and lower limits of each collective variable biased (Crespo, Y. et al. *Phys. Rev. E* **81**, 055701, 2010). Note the specified 'temperature bias' is not the simulation temperature, which was in all cases 298 K. This scheme allows for an efficient exploration of the multidimensional collective-variable space: replicas with larger values of the temperature-bias and/or Gaussians widths are able to access high free-energy regions, albeit at low spatial resolution. Replicas with smaller values primarily sample low free-energy regions but at high spatial resolution.

<sup>(b)</sup> In the simulations of the  $\text{Ca}^{2+}$ -bound state, all  $\sigma (V_2)$  values were scaled down by a factor 1.4, so as to provide greater spatial resolution.

## **Supplementary Table 2**

Deviation in the geometry of the (truncated) ion-binding region of NCX\_Mj upon optimization via quantum-mechanical calculations, with respect to the input structure obtained via classical MD simulations, for different ions and occupancies.

|                                    | 3×Na <sup>+</sup> | 2×Na <sup>+</sup> | 1×Ca <sup>2+</sup>       | Ca <sup>2+</sup> vs Sr <sup>2+</sup> |
|------------------------------------|-------------------|-------------------|--------------------------|--------------------------------------|
| RMSD, all atoms (Å) <sup>a</sup>   | 0.45              | 0.40              | 0.32 (0.40) <sup>c</sup> | 0.10 <sup>d</sup>                    |
| RMSD, cation site (Å) <sup>b</sup> | 0.26              | 0.42              | 0.17 (0.23) <sup>c</sup> | 0.14 <sup>d</sup>                    |

<sup>(a)</sup> The truncated ion-binding regions are depicted in Supplementary Fig. 6; the all-atom RMSD value does not include hydrogen atoms.

<sup>(b)</sup> This RMSD value is that of the bound ions and the coordinating oxygen atoms.

<sup>(c)</sup> Values in parenthesis refer to the geometry optimization using the SDD basis set (rather than with cc-pv-dz).

<sup>(d)</sup> These RMSD values compare the optimized geometries of the Ca<sup>2+</sup>- and Sr<sup>2+</sup>-bound states (both with the SDD basis set).
